# Supplementary material for: Biofouling affects the redox kinetics of outer and inner sphere probes on carbon surfaces drastically differently – implications to biosensing
Source: Royal Society of Chemistry journal article supplement (doi:10.1039/d0cp02251a), 2020-01-01
Supplement: d0cp02251a1.pdf [file d0cp02251a1.pdf]

*Supplementary information*

**Biofouling affects the redox kinetics of outer and inner  
sphere probes on carbon surfaces drastically differently -  
implications to biosensing**

*Emilia Peltola<sup>1\*</sup>, Anja Aarva<sup>1</sup>, Sami Sainio<sup>2, 3</sup>, Joonas J. Heikkinen<sup>4</sup>, Niklas Wester<sup>4</sup>, Ville  
Jokinen<sup>4</sup>, Jari Koskinen<sup>4</sup>, Tomi Laurila<sup>1</sup>*

<sup>1</sup> Department of Electrical Engineering and Automation, School of Electrical Engineering, Aalto University, Espoo, Finland

<sup>2</sup> Stanford Synchrotron Radiation Lightsource, SLAC National Accelerator Laboratory, Menlo Park, CA 94025, USA

<sup>3</sup> Microelectronics Research Unit, Faculty of Information Technology and Electrical Engineering, University of Oulu, Oulu, Finland

<sup>4</sup> Department of Chemistry and Materials Science, School of Chemical Technology, Aalto University, Espoo, Finland

\* Corresponding Author: [emilia.peltola@aalto.fi](mailto:emilia.peltola@aalto.fi)

Table S1:  $E_{1/2}$ (mV) values for DA measurements before and after fouling in BSA and FBS. Shown error is a standard deviation of at least two samples.

|               | <b>ta-C</b> | <b>nanograss-ta-C</b> | <b>PyC</b> | <b>nanograss-PyC</b> |
|---------------|-------------|-----------------------|------------|----------------------|
| DA            | 206 ± 5     | 178 ± 2               | 172 ± 0    | 171 ± 3              |
| BSA           | 275 ± 16    | 185 ± 3               | 190 ± 0    | 182 ± 7              |
| BSA pristine* | 316 ± 25    | 181 ± 0               | 220 ± 4    | 150 ± 16             |
| FBS           | 281 ± 6     | 187 ± 4               | 176 ± 6    | 186 ± 46             |
| FBS pristine* | 305 ± 23    | 161 ± 4               | 234 ± 8    | 186 ± 4              |

\* 'Pristine' refers to measurements conducted on pristine samples (i.e. no previous DA measurements) after fouling.
